# Supplementary material for: Lifestyle Behaviors and Cardiometabolic Diseases by Race and Ethnicity and Social Risk Factors Among US Young Adults, 2011 to 2018
Source: PubMed Central journal article supplement — J Am Heart Assoc. 2023 Aug 23;12(17):e028926. doi: 10.1161/JAHA.122.028926 (PMC10547329; doi:10.1161/jaha.122.028926), 2023-08-23

# **Supplemental Material**

**Table S1. Sample sizes and definitions for lifestyle risk factors and cardiometabolic diseases.**

| <b>Outcome</b>                                      | <b>Sample size*</b> | <b>Definition</b>                                                                                                                                                                                                                                                                                                                   |
|-----------------------------------------------------|---------------------|-------------------------------------------------------------------------------------------------------------------------------------------------------------------------------------------------------------------------------------------------------------------------------------------------------------------------------------|
| Lifestyle risk factors                              |                     |                                                                                                                                                                                                                                                                                                                                     |
| Current smoking                                     | 10094               | Reporting at least 100 cigarettes smoked during their lifetime and were currently smoking                                                                                                                                                                                                                                           |
| Excessive drinking                                  | 8908                | Reporting having an average of $\geq 14$ drinks per week for men and $\geq 7$ drinks per week for women or at least 4 or 5 drinks in a single day                                                                                                                                                                                   |
| Poor diet quality                                   | 7981                | Having a Healthy Eating Index 2015 score $< 50$ out of 100 or $<$ the 25th percentile or $< 60$ out of 100                                                                                                                                                                                                                          |
| Inadequate physical activity                        | 10381               | Having $< 150$ minutes of moderate to vigorous physical activity per week (including work-related activity, leisure-time activity, and transportation activity)                                                                                                                                                                     |
| Inappropriate sleep duration                        | 10383               | Having $< 7$ hours or $> 9$ hours of sleep per night                                                                                                                                                                                                                                                                                |
| Cardiometabolic diseases                            |                     |                                                                                                                                                                                                                                                                                                                                     |
| Obesity                                             | 9844                | Having body mass index $\geq 30$ kg/m <sup>2</sup>                                                                                                                                                                                                                                                                                  |
| Severe obesity                                      | 9844                | Having body mass index $\geq 40$ kg/m <sup>2</sup>                                                                                                                                                                                                                                                                                  |
| Dyslipidemia                                        | 9323                | Having a total cholesterol level $\geq 240$ mg/dL, self-reported current use of lipid-lowering medications or a high-density lipoprotein cholesterol level $< 40$ mg/dL for men and $< 50$ mg/dL for women                                                                                                                          |
| Hypertension                                        | 9544                | Blood pressure $\geq 140/90$ mm Hg or self-reported current use of antihypertensive medications                                                                                                                                                                                                                                     |
| Prediabetes                                         | 4437                | Having a hemoglobin A1c level of 5.7-6.4% or a fasting plasma glucose level of 100-125 mg/dL among participants who did not report a diabetes diagnosis                                                                                                                                                                             |
| Diabetes                                            | 4437                | Having a self-reported previous diabetes diagnosis, a hemoglobin A1c level $\geq 6.5\%$ or a fasting plasma glucose level $\geq 126$ mg/dL                                                                                                                                                                                          |
| Chronic kidney disease                              | 9249                | Having a urine albumin-to-creatinine ratio $\geq 30$ mg/g or an estimated glomerular filtration rate $< 60$ mL/min/1.73 m <sup>2</sup>                                                                                                                                                                                              |
| Non-alcoholic fatty liver disease                   | 7911                | Having serum alanine aminotransferase activity $> 30$ IU/L for men and $> 19$ IU/L for women in the absence of excessive drinking and other identifiable causes of liver disease.                                                                                                                                                   |
| Metabolic syndrome                                  | 4107                | Having at least 3 of the following 5 criteria: waist circumference $> 102$ cm for men or $> 88$ cm for women, a triglycerides level $\geq 150$ mg/dL, a high-density lipoprotein cholesterol level $< 40$ mg/dL for men or $< 50$ mg/dL for women, blood pressure $\geq 130/85$ mm Hg, and a fasting glucose level $\geq 100$ mg/dL |
| 30-year atherosclerotic cardiovascular disease risk | 4108                | Based on the equation with body mass index included as a covariate from the Framingham Heart Study                                                                                                                                                                                                                                  |

\* Sample sizes were unweighted.

**Table S2. Missing data for stratification and outcome variables.**

| Variables                                              | Missing data, N (%) |
|--------------------------------------------------------|---------------------|
| Stratification variables                               |                     |
| Age                                                    | 0 (0.0%)            |
| Sex                                                    | 0 (0.0%)            |
| Race and ethnicity                                     | 0 (0.0%)            |
| Education level                                        | 5 (0.0%)            |
| Family income-to-poverty ratio                         | 1001 (9.6%)         |
| Food security status                                   | 303 (2.9%)          |
| Employment status                                      | 8 (0.1%)            |
| Home ownership                                         | 320 (3.1%)          |
| Insurance status                                       | 26 (0.2%)           |
| Regular health care access                             | 0 (0.0%)            |
| Country of birth                                       | 5 (0.0%)            |
| Outcome variables                                      |                     |
| Current smoking                                        | 311 (3.0%)          |
| Excessive drinking                                     | 1047 (10.5%)        |
| Poor diet quality                                      | 0 (0.0%)            |
| Inadequate physical activity                           | 24 (0.2%)           |
| Inappropriate sleep duration                           | 22 (0.2%)           |
| Obesity/Severe obesity                                 | 112 (1.1%)          |
| Dyslipidemia                                           | 633 (6.4%)          |
| Hypertension                                           | 412 (4.1%)          |
| Prediabetes/Diabetes                                   | 10 (0.2%)           |
| Chronic kidney disease                                 | 707 (7.1%)          |
| Non-alcoholic fatty liver disease                      | 596 (7.0%)          |
| Metabolic Syndrome                                     | 60 (1.4%)           |
| 30-year risk of atherosclerotic cardiovascular disease | 328 (7.4%)          |

**Table S3. Sample sizes\* for lifestyle risk factors by demographic variables and social risk factors.**

| <b>Characteristics</b>             | <b>Current smoking<sup>†</sup></b> | <b>Excessive drinking<sup>‡</sup></b> | <b>Poor diet quality<sup>§</sup></b> | <b>Inadequate physical activity<sup>  </sup></b> | <b>Inappropriate sleep duration<sup>#</sup></b> |
|------------------------------------|------------------------------------|---------------------------------------|--------------------------------------|--------------------------------------------------|-------------------------------------------------|
| Total                              | 10094                              | 8908                                  | 7981                                 | 10381                                            | 10383                                           |
| Age group, y                       |                                    |                                       |                                      |                                                  |                                                 |
| 18-24                              | 2732                               | 2691                                  | 2346                                 | 3031                                             | 3035                                            |
| 25-29                              | 1782                               | 1517                                  | 1337                                 | 1782                                             | 1780                                            |
| 30-34                              | 1907                               | 1607                                  | 1478                                 | 1902                                             | 1902                                            |
| 35-39                              | 1795                               | 1503                                  | 1363                                 | 1790                                             | 1791                                            |
| 40-44                              | 1878                               | 1590                                  | 1457                                 | 1876                                             | 1875                                            |
| Sex                                |                                    |                                       |                                      |                                                  |                                                 |
| Male                               | 4961                               | 4507                                  | 3894                                 | 5106                                             | 5110                                            |
| Female                             | 5133                               | 4401                                  | 4087                                 | 5275                                             | 5273                                            |
| Race and ethnicity                 |                                    |                                       |                                      |                                                  |                                                 |
| Non-Hispanic Asian                 | 1493                               | 1195                                  | 1069                                 | 1526                                             | 1527                                            |
| Non-Hispanic Black                 | 2192                               | 1965                                  | 1802                                 | 2289                                             | 2286                                            |
| Hispanic                           | 2635                               | 2316                                  | 2016                                 | 2719                                             | 2724                                            |
| Non-Hispanic White                 | 3292                               | 2978                                  | 2688                                 | 3354                                             | 3351                                            |
| Other**                            | 482                                | 454                                   | 406                                  | 493                                              | 495                                             |
| Education level                    |                                    |                                       |                                      |                                                  |                                                 |
| Less than high school              | 1902                               | 1693                                  | 1462                                 | 2000                                             | 2008                                            |
| High school graduate               | 2374                               | 2132                                  | 1872                                 | 2463                                             | 2458                                            |
| Some college                       | 3338                               | 2975                                  | 2660                                 | 3438                                             | 3438                                            |
| College graduate or higher         | 2475                               | 2107                                  | 1985                                 | 2475                                             | 2474                                            |
| Family income-to-poverty ratio     |                                    |                                       |                                      |                                                  |                                                 |
| ≤100%                              | 2432                               | 2171                                  | 1947                                 | 2551                                             | 2556                                            |
| ≥100%-299%                         | 3739                               | 3364                                  | 3012                                 | 3826                                             | 3821                                            |
| ≥300%-499%                         | 1600                               | 1445                                  | 1335                                 | 1630                                             | 1632                                            |
| ≥500%                              | 1360                               | 1179                                  | 1073                                 | 1376                                             | 1377                                            |
| Food security status <sup>††</sup> |                                    |                                       |                                      |                                                  |                                                 |
| Secure                             | 5981                               | 5259                                  | 4757                                 | 6134                                             | 6135                                            |

|                              |      |      |      |      |      |
|------------------------------|------|------|------|------|------|
| Marginal                     | 1456 | 1306 | 1181 | 1513 | 1512 |
| Insecure                     | 2355 | 2148 | 1899 | 2432 | 2433 |
| Employment status            |      |      |      |      |      |
| Employed                     | 7100 | 6186 | 5472 | 7192 | 7196 |
| Unemployed                   | 2985 | 2714 | 2502 | 3180 | 3178 |
| Home ownership               |      |      |      |      |      |
| Owned home                   | 4429 | 3993 | 3607 | 4549 | 4552 |
| Not owned home <sup>††</sup> | 5346 | 4709 | 4220 | 5514 | 5511 |
| Insurance status             |      |      |      |      |      |
| Insured                      | 7247 | 6409 | 5783 | 7467 | 7468 |
| Uninsured                    | 2824 | 2479 | 2178 | 2889 | 2889 |
| Regular health care access   |      |      |      |      |      |
| ≥1 Health care facilities    | 7331 | 6438 | 5830 | 7549 | 7543 |
| None                         | 2763 | 2470 | 2151 | 2832 | 2840 |
| Country of birth             |      |      |      |      |      |
| America                      | 7054 | 6395 | 5741 | 7285 | 7283 |
| Other countries              | 3035 | 2509 | 2237 | 3091 | 3095 |

\* Sample sizes were unweighted.

<sup>†</sup> Smoked at least 100 cigarettes during their lifetime and were currently smoking.

<sup>‡</sup> Having an average of ≥14 drinks per week for men and ≥7 drinks per week for women or at least 4 or 5 drinks in a single day.

<sup>§</sup> Having a Healthy Eating Index -2015 score <50.

<sup>||</sup> Having <150 minutes of moderate to vigorous physical activity per week (including work-related activity, leisure-time activity, and transportation activity).

<sup>#</sup> Having <7 hours or >9 hours of sleep per night.

<sup>\*\*</sup> The “other” group included other non-Hispanic races and mixed races.

<sup>††</sup> Food security level was measured using the US Household Food Security Survey Module in which 10 questions were used to create 4 response levels: full food security, marginal food security, low food security, and very low food security. Low food security and very low food security were combined into the “Insecure” category.

<sup>††</sup> Not owned home included participants renting a home or having other arrangements.

**Table S4. Sample sizes\* for cardiometabolic diseases by demographic variables and social risk factors.**

| Characteristics                    | Obesity <sup>†</sup> | Severe obesity <sup>†</sup> | Dyslipidemia <sup>‡</sup> | Hypertension <sup>§</sup> | Prediabetes <sup>  </sup> | Diabetes <sup>  </sup> | CKD <sup>#</sup> | NAFLD <sup>**</sup> | Metabolic syndrome <sup>††</sup> |
|------------------------------------|----------------------|-----------------------------|---------------------------|---------------------------|---------------------------|------------------------|------------------|---------------------|----------------------------------|
| Total                              | 9844                 | 9844                        | 9323                      | 9544                      | 4437                      | 4437                   | 9249             | 7911                | 4107                             |
| Age group, y                       |                      |                             |                           |                           |                           |                        |                  |                     |                                  |
| 18-24                              | 2865                 | 2865                        | 2678                      | 2786                      | 1199                      | 1199                   | 2655             | 2438                | 1167                             |
| 25-29                              | 1682                 | 1682                        | 1592                      | 1624                      | 715                       | 715                    | 1577             | 1333                | 686                              |
| 30-34                              | 1791                 | 1791                        | 1711                      | 1739                      | 802                       | 802                    | 1698             | 1435                | 750                              |
| 35-39                              | 1713                 | 1713                        | 1632                      | 1650                      | 809                       | 809                    | 1621             | 1312                | 735                              |
| 40-44                              | 1793                 | 1793                        | 1710                      | 1745                      | 912                       | 912                    | 1698             | 1393                | 769                              |
| Sex                                |                      |                             |                           |                           |                           |                        |                  |                     |                                  |
| Male                               | 4846                 | 4846                        | 4564                      | 4718                      | 2166                      | 2166                   | 4528             | 3647                | 2026                             |
| Female                             | 4998                 | 4998                        | 4759                      | 4826                      | 2271                      | 2271                   | 4721             | 4264                | 2081                             |
| Race and ethnicity                 |                      |                             |                           |                           |                           |                        |                  |                     |                                  |
| Non-Hispanic Asian                 | 1425                 | 1425                        | 1317                      | 1348                      | 656                       | 656                    | 1305             | 1192                | 607                              |
| Non-Hispanic Black                 | 2190                 | 2190                        | 2007                      | 2135                      | 942                       | 942                    | 1993             | 1711                | 849                              |
| Hispanic                           | 2556                 | 2556                        | 2468                      | 2464                      | 1164                      | 1164                   | 2447             | 2166                | 1067                             |
| Non-Hispanic White                 | 3193                 | 3193                        | 3076                      | 3107                      | 1465                      | 1465                   | 3050             | 2469                | 1396                             |
| Other <sup>‡‡</sup>                | 480                  | 480                         | 455                       | 469                       | 210                       | 210                    | 454              | 373                 | 188                              |
| Education level                    |                      |                             |                           |                           |                           |                        |                  |                     |                                  |
| Less than high school              | 1902                 | 1902                        | 1810                      | 1829                      | 909                       | 909                    | 1791             | 1500                | 819                              |
| High school graduate               | 2316                 | 2316                        | 2177                      | 2250                      | 1008                      | 1008                   | 2159             | 1802                | 931                              |
| Some college                       | 3271                 | 3271                        | 3116                      | 3187                      | 1451                      | 1451                   | 3103             | 2622                | 1331                             |
| College graduate or higher         | 2353                 | 2353                        | 2218                      | 2275                      | 1068                      | 1068                   | 2194             | 1985                | 1025                             |
| Family income-to-poverty ratio     |                      |                             |                           |                           |                           |                        |                  |                     |                                  |
| ≤100%                              | 2426                 | 2426                        | 2277                      | 2337                      | 1134                      | 1134                   | 2259             | 1912                | 1039                             |
| >100%-299%                         | 3677                 | 3677                        | 3512                      | 3586                      | 1661                      | 1661                   | 3485             | 2920                | 1537                             |
| >300%-499%                         | 1565                 | 1565                        | 1492                      | 1525                      | 726                       | 726                    | 1477             | 1283                | 676                              |
| ≥500%                              | 1303                 | 1303                        | 1227                      | 1265                      | 550                       | 550                    | 1219             | 1083                | 524                              |
| Food security status <sup>§§</sup> |                      |                             |                           |                           |                           |                        |                  |                     |                                  |
| Secure                             | 5819                 | 5819                        | 5518                      | 5635                      | 2573                      | 2573                   | 5464             | 4775                | 2414                             |

|                                |      |      |      |      |      |      |      |      |      |
|--------------------------------|------|------|------|------|------|------|------|------|------|
| Marginal                       | 1455 | 1455 | 1388 | 1413 | 696  | 696  | 1380 | 1165 | 644  |
| Insecure                       | 2339 | 2339 | 2209 | 2276 | 1075 | 1075 | 2199 | 1792 | 968  |
| Employment status              |      |      |      |      |      |      |      |      |      |
| Employed                       | 6832 | 6832 | 6487 | 6615 | 3040 | 3040 | 6441 | 5493 | 2839 |
| Unemployed                     | 3004 | 3004 | 2828 | 2921 | 1392 | 1392 | 2800 | 2411 | 1263 |
| Home ownership                 |      |      |      |      |      |      |      |      |      |
| Owned home                     | 4354 | 4354 | 4170 | 4239 | 1956 | 1956 | 4137 | 3575 | 1825 |
| Not owned home <sup>llll</sup> | 5244 | 5244 | 4927 | 5070 | 2378 | 2378 | 4888 | 4142 | 2192 |
| Insurance status               |      |      |      |      |      |      |      |      |      |
| Insured                        | 7083 | 7083 | 6693 | 6884 | 3167 | 3167 | 6634 | 5793 | 2926 |
| Uninsured                      | 2739 | 2739 | 2611 | 2638 | 1263 | 1263 | 2596 | 2099 | 1174 |
| Regular health care access     |      |      |      |      |      |      |      |      |      |
| ≥1 Health care facilities      | 7154 | 7154 | 6772 | 6933 | 3230 | 3230 | 6723 | 5802 | 2955 |
| None                           | 2690 | 2690 | 2551 | 2611 | 1207 | 1207 | 2526 | 2109 | 1152 |
| Country of birth               |      |      |      |      |      |      |      |      |      |
| America                        | 6913 | 6913 | 6552 | 6751 | 3087 | 3087 | 6495 | 5451 | 2878 |
| Other countries                | 2926 | 2926 | 2767 | 2789 | 1349 | 1349 | 2750 | 2457 | 1228 |

CKD, chronic kidney disease; NAFLD, non-alcoholic fatty liver disease.

\* Sample sizes were unweighted.

<sup>†</sup> Obesity was defined as body mass index  $\geq 30$  kg/m<sup>2</sup>; Severe obesity was defined as body mass index  $\geq 40$  kg/m<sup>2</sup>.

<sup>‡</sup> Having a total cholesterol level  $\geq 240$  mg/dL, self-reported current use of lipid-lowering medications or a high-density lipoprotein cholesterol level  $< 40$  mg/dL for men and  $< 50$  mg/dL for women.

<sup>§</sup> Blood pressure  $\geq 140/90$  mm Hg or self-reported current use of antihypertensive medication.

<sup>||</sup> Prediabetes was defined as having a hemoglobin A1c level of 5.7-6.4% or a fasting plasma glucose level of 100-125 mg/dL among participants who did not report a diabetes diagnosis; Diabetes was defined as having a self-reported previous diabetes diagnosis, a hemoglobin A1c level  $\geq 6.5\%$  or a fasting plasma glucose level  $\geq 126$  mg/dL.

<sup>#</sup> Having a urine albumin-to-creatinine ratio  $\geq 30$  mg/g or an estimated glomerular filtration rate  $< 60$  mL/min/1.73 m<sup>2</sup>.

<sup>\*\*</sup> Having serum alanine aminotransferase activity  $> 30$  IU/L for men and  $> 19$  IU/L for women in the absence of excessive drinking and other identifiable causes of liver disease.

<sup>††</sup> Having at least 3 of the following 5 criteria: waist circumference  $> 102$  cm for men or  $> 88$  cm for women, a triglycerides level  $\geq 150$  mg/dL, a high-density lipoprotein cholesterol level  $< 40$  mg/dL for men or  $< 50$  mg/dL for women, blood pressure  $\geq 130/85$  mm Hg, and a fasting glucose level  $\geq 100$  mg/dL.

<sup>†††</sup>The “other” group included other non-Hispanic races and mixed races.

<sup>§§</sup> Food security level was measured using the US Household Food Security Survey Module in which 10 questions were used to create 4 response levels: full food security, marginal food security, low food security, and very low food security. Low food security and very low food security were combined into the “Insecure” category.

<sup>llll</sup> Not owned home included participants renting a home or having other arrangements.

**Table S5. Sample sizes\* for clustering of lifestyle risk factors and cardiometabolic diseases by demographic variables and social risk factors.**

| Characteristics                   | Number of lifestyle risk factors <sup>†</sup> |      |      | Number of cardiometabolic diseases <sup>‡</sup> |      |      | 30-year risk of atherosclerotic cardiovascular disease <sup>§</sup> |
|-----------------------------------|-----------------------------------------------|------|------|-------------------------------------------------|------|------|---------------------------------------------------------------------|
|                                   | 0                                             | 1    | ≥2   | 0                                               | 1    | ≥2   |                                                                     |
| Total                             | 7830                                          | 7555 | 7703 | 4043                                            | 3743 | 4089 | 4108                                                                |
| Age group, y                      |                                               |      |      |                                                 |      |      |                                                                     |
| 18-24                             | 2276                                          | 2127 | 2195 | 1100                                            | 1039 | 1125 | 1025                                                                |
| 25-29                             | 1318                                          | 1300 | 1319 | 642                                             | 598  | 668  | 688                                                                 |
| 30-34                             | 1461                                          | 1436 | 1453 | 726                                             | 673  | 734  | 773                                                                 |
| 35-39                             | 1335                                          | 1291 | 1318 | 733                                             | 663  | 735  | 770                                                                 |
| 40-44                             | 1440                                          | 1401 | 1418 | 842                                             | 770  | 827  | 852                                                                 |
| Sex                               |                                               |      |      |                                                 |      |      |                                                                     |
| Male                              | 3838                                          | 3723 | 3777 | 1907                                            | 1742 | 1975 | 2012                                                                |
| Female                            | 3992                                          | 3832 | 3926 | 2136                                            | 2001 | 2114 | 2096                                                                |
| Race and ethnicity                |                                               |      |      |                                                 |      |      |                                                                     |
| Non-Hispanic Asian                | 1038                                          | 996  | 1027 | 598                                             | 564  | 612  | 611                                                                 |
| Non-Hispanic Black                | 1774                                          | 1690 | 1716 | 860                                             | 801  | 869  | 848                                                                 |
| Hispanic                          | 1976                                          | 1892 | 1932 | 1086                                            | 1020 | 1092 | 398                                                                 |
| Non-Hispanic White                | 2644                                          | 2589 | 2632 | 1307                                            | 1178 | 1322 | 1370                                                                |
| Other <sup>  </sup>               | 398                                           | 388  | 396  | 194                                             | 180  | 194  | 197                                                                 |
| Education level                   |                                               |      |      |                                                 |      |      |                                                                     |
| Less than high school             | 1420                                          | 1346 | 1386 | 831                                             | 753  | 815  | 810                                                                 |
| High school graduate              | 1852                                          | 1791 | 1811 | 917                                             | 839  | 920  | 926                                                                 |
| Some college                      | 2614                                          | 2521 | 2566 | 1328                                            | 1226 | 1342 | 1344                                                                |
| College graduate or higher        | 1942                                          | 1895 | 1938 | 966                                             | 924  | 1011 | 1028                                                                |
| Family income-to-poverty ratio    |                                               |      |      |                                                 |      |      |                                                                     |
| ≤100%                             | 1907                                          | 1826 | 1864 | 1041                                            | 960  | 1046 | 1020                                                                |
| >100%-299%                        | 2963                                          | 2869 | 2918 | 1525                                            | 1398 | 1523 | 1559                                                                |
| ≥300%-499%                        | 1305                                          | 1270 | 1300 | 649                                             | 606  | 672  | 679                                                                 |
| ≥500%                             | 1054                                          | 1020 | 1039 | 496                                             | 471  | 518  | 525                                                                 |
| Food security status <sup>#</sup> |                                               |      |      |                                                 |      |      |                                                                     |



|                           |      |      |      |      |      |      |      |
|---------------------------|------|------|------|------|------|------|------|
| Secure                    | 4658 | 4492 | 4589 | 2344 | 2200 | 2401 | 2404 |
| Marginal                  | 1160 | 1107 | 1128 | 633  | 574  | 631  | 631  |
| Insecure                  | 1869 | 1817 | 1846 | 985  | 892  | 972  | 993  |
| Employment status         |      |      |      |      |      |      |      |
| Employed                  | 5396 | 5248 | 5323 | 2763 | 2556 | 2804 | 2868 |
| Unemployed                | 2427 | 2300 | 2373 | 1276 | 1183 | 1280 | 1235 |
| Home ownership            |      |      |      |      |      |      |      |
| Owned home                | 3539 | 3410 | 3477 | 1785 | 1659 | 1808 | 1825 |
| Not owned home**          | 4138 | 3996 | 4076 | 2167 | 1999 | 2188 | 2194 |
| Insurance status          |      |      |      |      |      |      |      |
| Insured                   | 5667 | 5468 | 5582 | 2912 | 2719 | 2941 | 2921 |
| Uninsured                 | 2144 | 2069 | 2102 | 1124 | 1017 | 1141 | 1180 |
| Regular healthcare access |      |      |      |      |      |      |      |
| ≥1 Health care facilities | 5712 | 5511 | 5628 | 2978 | 2771 | 2992 | 2987 |
| None                      | 2118 | 2044 | 2075 | 1065 | 972  | 1097 | 1121 |
| Country of birth          |      |      |      |      |      |      |      |
| America                   | 5653 | 5479 | 5564 | 2808 | 2583 | 2833 | 2850 |
| Other countries           | 2174 | 2073 | 2136 | 1234 | 1159 | 1255 | 1257 |

\* Sample sizes were unweighted.

† Included current smoking, excessive drinking, poor diet quality, inadequate physical activity, and inappropriate sleep duration (definitions are shown in Table S1).

‡ Included dyslipidemia, hypertension, diabetes, chronic kidney disease, and non-alcoholic fatty liver disease (definitions are shown in Table S1).

§ Based on the equation with body mass index included as a covariate from the Framingham Heart Study.

|| The “other” group included other non-Hispanic races and mixed races.

# Food security level was measured using the US Household Food Security Survey Module in which 10 questions were used to create 4 response levels: full food security, marginal food security, low food security, and very low food security. Low food security and very low food security were combined into the “Insecure” category.

\*\* Not owned home included participants renting a home or having other arrangements.

**Table S6. Racial and ethnic differences in the prevalence of lifestyle risk factors after adjusting for demographic variables and social risk factors.**

| Lifestyle risk factors <sup>§</sup>                    | N*   | Difference in the prevalence, % (95% CI) <sup>†</sup> |                                                                          |
|--------------------------------------------------------|------|-------------------------------------------------------|--------------------------------------------------------------------------|
|                                                        |      | Age-, age squared-, and sex-adjusted                  | Age-, age squared-, sex-, and social risk factors- adjusted <sup>‡</sup> |
| Current smoking                                        |      |                                                       |                                                                          |
| Asian - White                                          | 9100 | -14.7 (-17.8 to -11.5)                                | -5.2 (-10.2 to -0.2)                                                     |
| Black - White                                          |      | -1.2 (-4.2 to 1.8)                                    | -8.0 (-10.4 to -5.6)                                                     |
| Hispanic - White                                       |      | -8.3 (-11.5 to -5)                                    | -11.8 (-15.2 to -8.3)                                                    |
| Excessive drinking                                     |      |                                                       |                                                                          |
| Asian - White                                          | 8132 | -11.7 (-14.5 to -8.9)                                 | -7.7 (-11.8 to -3.7)                                                     |
| Black - White                                          |      | -2.6 (-5.5 to 0.2)                                    | -4.9 (-7.5 to -2.4)                                                      |
| Hispanic - White                                       |      | -5.7 (-8.4 to -2.9)                                   | -6.4 (-9.1 to -3.6)                                                      |
| Inappropriate sleep duration                           |      |                                                       |                                                                          |
| Asian - White                                          | 9353 | -4.8 (-8.0 to -1.5)                                   | 2.5 (-1.8 to 6.9)                                                        |
| Black - White                                          |      | 16.3 (13.2 to 19.5)                                   | 13.3 (9.9 to 16.7)                                                       |
| Hispanic - White                                       |      | 3.9 (0.8 to 7.0)                                      | 2.8 (-0.7 to 6.4)                                                        |
| Poor diet quality                                      |      |                                                       |                                                                          |
| Asian - White                                          | 7339 | -17.0 (-21.3 to -12.7)                                | -1.2 (-7.3 to 5.0)                                                       |
| Black - White                                          |      | 5.9 (1.6 to 10.3)                                     | 0.8 (-3.3 to 5.0)                                                        |
| Hispanic - White                                       |      | -4.3 (-9.0 to 0.4)                                    | -5.9 (-10.8 to -1.0)                                                     |
| Inadequate physical activity                           |      |                                                       |                                                                          |
| Asian - White                                          | 9352 | 10.2 (6.7 to 13.7)                                    | 8.4 (4.3 to 12.6)                                                        |
| Black - White                                          |      | 6.7 (3.9 to 9.5)                                      | 5.3 (2.7 to 8.0)                                                         |
| Hispanic - White                                       |      | 7.8 (5.1 to 10.5)                                     | 3.8 (1.0 to 6.6)                                                         |
| Having 0 lifestyle risk factors <sup>  </sup>          |      |                                                       |                                                                          |
| Asian - White                                          | 7202 | 8.5 (2.5 to 14.5)                                     | -2.0 (-7.3 to 3.3)                                                       |
| Black - White                                          |      | -9.5 (-12.6 to -6.4)                                  | -5.4 (-8.3 to -2.6)                                                      |
| Hispanic - White                                       |      | -3.7 (-7.3 to 0.0)                                    | 0.7 (-3.3 to 4.7)                                                        |
| Having only 1 lifestyle risk factors <sup>  </sup>     |      |                                                       |                                                                          |
| Asian - White                                          | 6959 | 2.9 (-3 to 8.7)                                       | -2.8 (-9.3 to 3.8)                                                       |
| Black - White                                          |      | -3.1 (-6.9 to 0.7)                                    | 0.4 (-3.9 to 4.8)                                                        |
| Hispanic - White                                       |      | 4.5 (0.2 to 8.9)                                      | 8.0 (3.1 to 12.9)                                                        |
| Having at least 2 lifestyle risk factors <sup>  </sup> |      |                                                       |                                                                          |
| Asian - White                                          | 7094 | -12.2 (-17.8 to -6.5)                                 | 3.7 (-3.2 to 10.5)                                                       |
| Black - White                                          |      | 12.4 (7.9 to 16.9)                                    | 4.0 (-0.3 to 8.3)                                                        |
| Hispanic - White                                       |      | -1.2 (-6.2 to 3.8)                                    | -7.2 (-12.0 to -2.4)                                                     |

\* Total unweighted sample sizes.

<sup>†</sup> Multivariable weighted logistic regression models were used to assess racial and ethnic differences in the prevalence of lifestyle risk factors.

<sup>‡</sup> Social risk factors included education (< high school, high school graduate, some college, and ≥college graduate), family income-to-poverty ratio (≤100%, >100%-299%, 300%-499%, and ≥500%), home ownership (yes/no), employment status (yes/no), health insurance status (yes/no), regular health care access (yes/no), food security status (secure, marginal and insecure), and country of birth (America/others).

<sup>§</sup> Definitions for lifestyle risk factors are shown in Table S1.<sup>||</sup> Included current smoking, excessive drinking, poor diet quality, inadequate physical activity, and inappropriate sleep duration (definitions are shown in Table S1).

**Table S7. Prevalence of lifestyle risk factors and cardiometabolic diseases by education level among young adults aged 25 years or greater.**

|                                       | N, prevalence % (95% CI)* |                  |                       |                  |             |                  |              |                  |                            |                  |
|---------------------------------------|---------------------------|------------------|-----------------------|------------------|-------------|------------------|--------------|------------------|----------------------------|------------------|
|                                       | Overall                   |                  | Less than high school |                  | High school |                  | Some college |                  | College graduate or higher |                  |
| Lifestyle risk factors <sup>†</sup>   |                           |                  |                       |                  |             |                  |              |                  |                            |                  |
| Current smoking                       | 7358                      | 23.1 (21.6-24.7) | 1333                  | 34.4 (30.3-38.5) | 1490        | 33.4 (30.0-36.9) | 2292         | 27.0 (24.6-29.3) | 2243                       | 9.4 (7.8-11.1)   |
| Excessive drinking                    | 6216                      | 18.7 (17.2-20.3) | 1103                  | 22.6 (19.6-25.7) | 1262        | 23.8 (20.8-26.7) | 1954         | 21.0 (18.3-23.6) | 1897                       | 12.2 (9.7-14.7)  |
| Poor diet quality                     | 5633                      | 46.0 (43.1-48.8) | 959                   | 56.2 (50.9-61.4) | 1119        | 58.6 (54.1-63.2) | 1764         | 51.7 (47.6-55.8) | 1791                       | 30.7 (27.0-34.4) |
| Inadequate physical activity          | 7346                      | 27.4 (26.1-28.7) | 1325                  | 35.5 (32.3-38.7) | 1490        | 28.8 (25.8-31.7) | 2288         | 26.0 (23.6-28.3) | 2243                       | 24.7 (21.9-27.4) |
| Inappropriate sleep duration          | 7344                      | 35.8 (34.1-37.4) | 1330                  | 43.0 (39.2-46.8) | 1484        | 40.7 (37.6-43.9) | 2288         | 39.7 (36.8-42.7) | 2242                       | 26.4 (24.2-28.7) |
| Number of lifestyle risk factors      |                           |                  |                       |                  |             |                  |              |                  |                            |                  |
| 0                                     | 5552                      | 20.9 (18.5-23.3) | 940                   | 9.0 (6.4-11.7)   | 1112        | 11.2 (8.7-13.8)  | 1749         | 15.4 (12.5-18.4) | 1751                       | 35.0 (31.2-38.7) |
| 1                                     | 5426                      | 32.8 (31.0-34.5) | 919                   | 23.3 (19.1-27.6) | 1092        | 25.8 (22.8-28.8) | 1710         | 33.2 (29.7-36.7) | 1705                       | 39.4 (36.2-42.6) |
| ≥2                                    | 5506                      | 45.2 (42.8-47.7) | 937                   | 65.7 (60.7-70.6) | 1099        | 62.6 (58.9-66.2) | 1725         | 50.4 (46.6-54.3) | 1745                       | 24.6 (21.4-27.8) |
| Cardiometabolic diseases <sup>†</sup> |                           |                  |                       |                  |             |                  |              |                  |                            |                  |
| Obesity                               | 6977                      | 39.0 (37.2-40.8) | 1266                  | 42.2 (38.3-46.0) | 1400        | 45.5 (42.9-48.2) | 2176         | 45.5 (43.1-48.0) | 2135                       | 28.1 (25.1-31.2) |
| Severe obesity                        | 6977                      | 8.6 (7.7-9.6)    | 1266                  | 8.6 (6.5-10.8)   | 1400        | 10.4 (8.5-12.3)  | 2176         | 11.3 (9.6-12.9)  | 2135                       | 5.3 (3.9-6.7)    |
| Dyslipidemia                          | 6643                      | 39.5 (37.7-41.3) | 1206                  | 48.2 (44.5-52.0) | 1331        | 42.0 (38.9-45.1) | 2096         | 44.6 (41.7-47.5) | 2010                       | 30.0 (27.5-32.5) |
| Hypertension                          | 6755                      | 13.0 (11.7-14.3) | 1207                  | 13.8 (11.3-16.2) | 1359        | 16.2 (13.6-18.7) | 2127         | 14.8 (12.5-17.2) | 2062                       | 8.8 (7.0-10.5)   |
| Prediabetes                           | 3237                      | 28.9 (26.3-31.4) | 646                   | 37.0 (32.0-41.9) | 629         | 34.9 (29.3-40.5) | 1001         | 27.3 (23.5-31.2) | 961                        | 22.3 (18.5-26.1) |
| Diabetes                              | 3237                      | 5.5 (4.9-6.1)    | 646                   | 6.9 (5.1-8.7)    | 629         | 6.6 (5.2-8.1)    | 1001         | 6.6 (5.3-7.9)    | 961                        | 2.7 (1.9-3.6)    |
| Chronic kidney disease                | 6592                      | 6.6 (5.8-7.3)    | 1197                  | 9.8 (8.0-11.7)   | 1319        | 7.3 (5.7-9.0)    | 2089         | 6.1 (4.9-7.4)    | 1987                       | 5.1 (3.8-6.4)    |
| Non-alcoholic fatty liver disease     | 5471                      | 33.5 (31.8-35.3) | 958                   | 39.6 (36.3-42.8) | 1033        | 32.4 (28.7-36.1) | 1683         | 36.0 (33.3-38.6) | 1797                       | 30.2 (26.9-33.5) |
| Metabolic Syndrome                    | 2939                      | 22.8 (20.7-24.9) | 564                   | 30.4 (25.2-35.7) | 565         | 25.5 (21.3-29.7) | 891          | 26.2 (22.1-30.3) | 919                        | 13.9 (11.3-16.4) |
| Number of cardiometabolic diseases    |                           |                  |                       |                  |             |                  |              |                  |                            |                  |
| 0                                     | 2953                      | 36.4 (33.9-38.9) | 593                   | 27.3 (22.3-32.4) | 576         | 33.7 (29.1-38.3) | 908          | 33.7 (29.4-38.1) | 876                        | 44.7 (40.5-49.0) |
| 1                                     | 2711                      | 31.8 (29.9-33.6) | 531                   | 32.9 (27.2-38.5) | 515         | 31.3 (26.2-36.4) | 832          | 31.0 (27.1-34.9) | 833                        | 32.5 (28.6-36.4) |
| ≥2                                    | 2971                      | 25.1 (23.4-26.8) | 576                   | 32.5 (27.9-37.1) | 567         | 26.8 (23.1-30.5) | 921          | 27.8 (23.9-31.7) | 907                        | 18.4 (15.7-21.2) |
| 30-year risk of ASCVD                 | 3083                      | 17.6 (17.0-18.3) | 605                   | 19.6 (18.5-20.7) | 598         | 20.0 (18.9-21.1) | 955          | 18.2 (17.3-19.1) | 925                        | 14.1 (13.4-14.8) |

ASCVD, atherosclerotic cardiovascular disease.

\* Prevalence was age-standardized to the 2017-2018 National Health and Nutrition Examination Survey nonpregnant adult population, using the age groups 25 to 34 years and 35 to 44 years. Prevalence was weighted and sample sizes were unweighted.<sup>†</sup> Definitions for lifestyle risk factors and cardiometabolic diseases are shown in Table S1.

**Table S8. Racial and ethnic differences in the prevalence of cardiometabolic diseases adjusting for demographic variables, social risk factors (excluding family income-to-poverty ratio), and lifestyle factors.**

| Cardiometabolic diseases <sup>  </sup> | N*   | Difference in the prevalence, % (95% CI) <sup>†</sup> |                                                                         |                                                                       |                                                                                               |
|----------------------------------------|------|-------------------------------------------------------|-------------------------------------------------------------------------|-----------------------------------------------------------------------|-----------------------------------------------------------------------------------------------|
|                                        |      | Age-, age squared-, and sex-adjusted                  | Age-, age squared-, sex-, and social risk factors-adjusted <sup>‡</sup> | Age-, age squared-, sex-, and lifestyle factors-adjusted <sup>‡</sup> | Age-, age squared-, sex-, social risk factors-, and lifestyle factors-adjusted <sup>‡,§</sup> |
| <b>Obesity</b>                         |      |                                                       |                                                                         |                                                                       |                                                                                               |
| Asian - White                          | 7037 | -18.1 (-22.2 to -13.9)                                | -8.2 (-14.4 to -2.0)                                                    | -16.2 (-20.6 to -11.8)                                                | -7.8 (-13.9 to -1.7)                                                                          |
| Black - White                          |      | 11.6 (7.1 to 16.0)                                    | 8.5 (4.4 to 12.6)                                                       | 9.9 (5.5 to 14.3)                                                     | 7.3 (3.2 to 11.4)                                                                             |
| Hispanic - White                       |      | 10.0 (6.1 to 13.9)                                    | 13.0 (8.6 to 17.5)                                                      | 10.2 (6.3 to 14.1)                                                    | 12.8 (8.3 to 17.2)                                                                            |
| <b>Severe obesity</b>                  |      |                                                       |                                                                         |                                                                       |                                                                                               |
| Asian - White                          | 7037 | -6.3 (-8.1 to -4.5)                                   | -4.6 (-7.7 to -1.5)                                                     | -6.0 (-7.9 to -4.1)                                                   | -4.5 (-7.6 to -1.3)                                                                           |
| Black - White                          |      | 5.2 (2.8 to 7.5)                                      | 3.3 (1.3 to 5.3)                                                        | 4.7 (2.4 to 7.0)                                                      | 3.2 (1.2 to 5.2)                                                                              |
| Hispanic - White                       |      | 1.4 (-0.9 to 3.8)                                     | 2.8 (-0.1 to 5.8)                                                       | 1.7 (-0.6 to 4.0)                                                     | 2.9 (-0.1 to 5.8)                                                                             |
| <b>Dyslipidemia</b>                    |      |                                                       |                                                                         |                                                                       |                                                                                               |
| Asian - White                          | 6750 | -3.5 (-8.9 to 1.9)                                    | -0.5 (-7.2 to 6.3)                                                      | -1.7 (-7.0 to 3.5)                                                    | -1.2 (-7.7 to 5.2)                                                                            |
| Black - White                          |      | -3.8 (-7.8 to 0.2)                                    | -7.6 (-11.6 to -3.5)                                                    | -5.7 (-9.7 to -1.6)                                                   | -8.4 (-12.5 to -4.3)                                                                          |
| Hispanic - White                       |      | 7.5 (3.7 to 11.2)                                     | 2.2 (-2.5 to 6.8)                                                       | 7.7 (4 to 11.3)                                                       | 2.5 (-2.2 to 7.2)                                                                             |
| <b>Hypertension</b>                    |      |                                                       |                                                                         |                                                                       |                                                                                               |
| Asian - White                          | 6961 | -0.2 (-2.7 to 2.3)                                    | 6.0 (1.8 to 10.1)                                                       | 1.1 (-1.7 to 3.8)                                                     | 6.2 (2.2 to 10.3)                                                                             |
| Black - White                          |      | 8.7 (5.7 to 11.7)                                     | 6.9 (4.3 to 9.5)                                                        | 8.3 (5.3 to 11.2)                                                     | 6.8 (4.1 to 9.4)                                                                              |
| Hispanic - White                       |      | 0.6 (-1.5 to 2.7)                                     | 1.9 (-0.6 to 4.3)                                                       | 0.8 (-1.3 to 2.8)                                                     | 1.7 (-0.7 to 4.1)                                                                             |
| <b>Prediabetes</b>                     |      |                                                       |                                                                         |                                                                       |                                                                                               |
| Asian - White                          | 3649 | 0.6 (-4.0 to 5.2)                                     | 3.0 (-2.8 to 8.8)                                                       | 4.1 (-0.5 to 8.8)                                                     | 4.2 (-1.6 to 9.9)                                                                             |
| Black - White                          |      | 9.3 (5.1 to 13.5)                                     | 7.5 (3.2 to 11.9)                                                       | 9.0 (4.8 to 13.2)                                                     | 7.9 (3.4 to 12.3)                                                                             |
| Hispanic - White                       |      | 9.7 (5.1 to 14.4)                                     | 6.7 (1.3 to 12.1)                                                       | 10.6 (5.9 to 15.2)                                                    | 7.6 (2.0 to 13.2)                                                                             |
| <b>Diabetes</b>                        |      |                                                       |                                                                         |                                                                       |                                                                                               |
| Asian - White                          | 3649 | 0.6 (-0.9 to 2.2)                                     | 1.5 (-0.7 to 3.7)                                                       | 0.8 (-0.9 to 2.4)                                                     | 1.5 (-0.7 to 3.7)                                                                             |
| Black - White                          |      | 3.1 (1.5 to 4.6)                                      | 2.4 (0.8 to 4)                                                          | 3.3 (1.6 to 4.9)                                                      | 2.6 (0.9 to 4.2)                                                                              |
| Hispanic - White                       |      | 1.6 (0.2 to 3.1)                                      | 1.0 (-0.6 to 2.6)                                                       | 1.7 (0.3 to 3.2)                                                      | 0.9 (-0.6 to 2.5)                                                                             |
| <b>Chronic kidney disease</b>          |      |                                                       |                                                                         |                                                                       |                                                                                               |
| Asian - White                          | 6713 | -0.7 (-3.1 to 1.8)                                    | -1.1 (-4.0 to 1.9)                                                      | -0.7 (-3.2 to 1.8)                                                    | -1.1 (-4.0 to 1.8)                                                                            |

|                                                                      |      |                      |                     |                       |                       |
|----------------------------------------------------------------------|------|----------------------|---------------------|-----------------------|-----------------------|
| Black - White                                                        |      | 2.1 (0.3 to 4.0)     | 1.4 (-0.6 to 3.4)   | 2.0 (0.1 to 3.8)      | 1.2 (-0.8 to 3.3)     |
| Hispanic - White                                                     |      | 0.4 (-1.6 to 2.5)    | -1.0 (-3.1 to 1.2)  | 0.2 (-1.8 to 2.2)     | -1.2 (-3.3 to 0.9)    |
| Non-alcoholic fatty liver disease                                    |      |                      |                     |                       |                       |
| Asian - White                                                        | 5631 | -1.3 (-6.0 to 3.4)   | -0.7 (-7.1 to 5.8)  | -1.4 (-6.2 to 3.4)    | -0.6 (-7.1 to 5.8)    |
| Black - White                                                        |      | -9.7 (-14.7 to -4.7) | -11.2 (-16 to -6.3) | -10.6 (-15.5 to -5.7) | -12.0 (-16.8 to -7.2) |
| Hispanic - White                                                     |      | 10.2 (5.6 to 14.7)   | 9.0 (4.0 to 14.0)   | 9.5 (5.0 to 14.1)     | 8.5 (3.4 to 13.5)     |
| Metabolic Syndrome                                                   |      |                      |                     |                       |                       |
| Asian - White                                                        | 3417 | -5.9 (-10.2 to -1.6) | 2.4 (-3.1 to 7.9)   | -4.0 (-8.8 to 0.9)    | 2.4 (-3.1 to 7.9)     |
| Black - White                                                        |      | -0.3 (-4.4 to 3.8)   | -2.7 (-6.2 to 0.9)  | -0.7 (-4.7 to 3.3)    | -2.7 (-6.3 to 0.9)    |
| Hispanic - White                                                     |      | 5.1 (1.6 to 8.6)     | 6.5 (2.8 to 10.3)   | 5.9 (2.3 to 9.4)      | 6.8 (3.0 to 10.6)     |
| Having 0 cardiometabolic diseases <sup>#</sup>                       |      |                      |                     |                       |                       |
| Asian - White                                                        | 3337 | 7.0 (0.1 to 13.8)    | 4.4 (-3.8 to 12.7)  | 4.5 (-2.4 to 11.4)    | 5.5 (-3.1 to 14.1)    |
| Black - White                                                        |      | 0.4 (-4.7 to 5.5)    | 4.7 (-0.4 to 9.7)   | 3.2 (-1.6 to 8.1)     | 6.3 (1.3 to 11.3)     |
| Hispanic - White                                                     |      | -7.3 (-12.6 to -1.9) | -5.0 (-11.3 to 1.2) | -8.3 (-13.7 to -3.0)  | -6.3 (-12.7 to 0.1)   |
| Having only 1 cardiometabolic disease <sup>#</sup>                   |      |                      |                     |                       |                       |
| Asian - White                                                        | 2095 | -2.9 (-9.7 to 3.9)   | -5.2 (-13.7 to 3.2) | -3.5 (-10.6 to 3.6)   | -5.7 (-14.2 to 2.9)   |
| Black - White                                                        |      | -1.4 (-5.7 to 2.8)   | -1.5 (-5.6 to 2.5)  | -1.4 (-5.6 to 2.9)    | -1.8 (-5.8 to 2.3)    |
| Hispanic - White                                                     |      | 3.5 (-0.6 to 7.6)    | 3.9 (-1.7 to 9.5)   | 3.4 (-0.6 to 7.5)     | 3.8 (-1.6 to 9.3)     |
| Having at least 2 cardiometabolic diseases <sup>#</sup>              |      |                      |                     |                       |                       |
| Asian - White                                                        | 3381 | -0.7 (-5.7 to 4.3)   | 2.5 (-3.2 to 8.3)   | -0.7 (-5.8 to 4.4)    | 1.5 (-4.1 to 7.0)     |
| Black - White                                                        |      | 2.4 (-1.9 to 6.7)    | -0.1 (-4.2 to 4.0)  | 1.2 (-3.0 to 5.4)     | -0.8 (-4.9 to 3.3)    |
| Hispanic - White                                                     |      | 6.4 (2.5 to 10.3)    | 4.9 (0.4 to 9.4)    | 6.0 (2.3 to 9.7)      | 4.4 (0.0 to 8.7)      |
| 30-year risk of atherosclerotic cardiovascular disease <sup>**</sup> |      |                      |                     |                       |                       |
| Asian - White                                                        | 3359 | -3.2 (-4.0 to -2.4)  | 0.0 (-0.9 to 0.9)   | -2.5 (-3.4 to -1.6)   | -0.2 (-0.9 to 0.6)    |
| Black - White                                                        |      | 2.9 (2.1 to 3.7)     | 1.9 (1.1 to 2.6)    | 2.5 (1.6 to 3.3)      | 2.1 (1.4 to 2.7)      |
| Hispanic - White                                                     |      | -0.5 (-1.2 to 0.3)   | 0.0 (-0.9 to 0.9)   | -0.2 (-0.9 to 0.6)    | 1.0 (0.3 to 1.7)      |

\* Unweighted sample size.

<sup>†</sup> Multivariable weighted logistic regression models were used to assess racial and ethnic differences in the prevalence of cardiometabolic diseases.

<sup>#</sup> Social risk factors included education (<high school, high school graduate, some college, and ≥college graduate), home ownership (yes/no), employment status (yes/no), health insurance status (yes/no), regular health care access (yes/no), food security status (secure, marginal, and insecure), and country of birth (America/other).

<sup>§</sup> Lifestyle factors included smoking status (never, former, and current), drinking status (never, former, non-excessive, and excessive), Healthy Eating Index-2015 score, Healthy Eating Index-

2015 score squared, physical activity (minutes), physical activity squared, sleep hours and sleep hours squared.

|| Definitions for cardiometabolic diseases are shown in Table S1.

# Included dyslipidemia, hypertension, diabetes, chronic kidney disease, and non-alcoholic fatty liver disease (definitions for cardiometabolic diseases are shown in Table S1).

\*\* Based on the equation with body mass index included as a covariate from the Framingham Heart Study.

**Table S9. Racial and ethnic differences in the prevalence of lifestyle risk factors after adjusting for demographic variables and social risk factors (excluding family income-to-poverty ratio).**

| Lifestyle risk factors <sup>§</sup>                    | N*    | Difference in the prevalence, % (95% CI) <sup>†</sup> |                                                                          |
|--------------------------------------------------------|-------|-------------------------------------------------------|--------------------------------------------------------------------------|
|                                                        |       | Age-, age squared-, and sex-adjusted                  | Age-, age squared-, sex-, and social risk factors- adjusted <sup>‡</sup> |
| Current smoking                                        |       |                                                       |                                                                          |
| Asian - White                                          | 9727  | -14.3 (-17.6 to -10.9)                                | -4.6 (-9.5 to 0.2)                                                       |
| Black - White                                          |       | -1.6 (-4.7 to 1.4)                                    | -7.8 (-10.2 to -5.5)                                                     |
| Hispanic - White                                       |       | -8.6 (-11.9 to -5.3)                                  | -12.1 (-15.6 to -8.7)                                                    |
| Excessive drinking                                     |       |                                                       |                                                                          |
| Asian - White                                          | 8662  | -12.0 (-14.6 to -9.4)                                 | -7.8 (-11.7 to -3.9)                                                     |
| Black - White                                          |       | -2.7 (-5.6 to 0.3)                                    | -4.9 (-7.5 to -2.2)                                                      |
| Hispanic - White                                       |       | -5.3 (-7.9 to -2.6)                                   | -5.7 (-8.5 to -2.9)                                                      |
| Inappropriate sleep duration                           |       |                                                       |                                                                          |
| Asian - White                                          | 10012 | -4.5 (-7.7 to -1.3)                                   | 2.9 (-1.3 to 7.1)                                                        |
| Black - White                                          |       | 16.4 (13.4 to 19.5)                                   | 13.7 (10.4 to 17.0)                                                      |
| Hispanic - White                                       |       | 3.7 (0.7 to 6.7)                                      | 2.7 (-0.8 to 6.3)                                                        |
| Poor diet quality                                      |       |                                                       |                                                                          |
| Asian - White                                          | 7792  | -16.5 (-20.8 to -12.2)                                | -0.8 (-6.8 to 5.2)                                                       |
| Black - White                                          |       | 5.6 (1.0 to 10.1)                                     | 1.1 (-3.2 to 5.4)                                                        |
| Hispanic - White                                       |       | -4.2 (-8.9 to 0.4)                                    | -5.3 (-10.3 to -0.4)                                                     |
| Inadequate physical activity                           |       |                                                       |                                                                          |
| Asian - White                                          | 10013 | 10.8 (7.3 to 14.2)                                    | 8.5 (4.5 to 12.5)                                                        |
| Black - White                                          |       | 6.8 (4.1 to 9.5)                                      | 5.3 (2.7 to 8.0)                                                         |
| Hispanic - White                                       |       | 8.3 (5.8 to 10.8)                                     | 3.7 (1.1 to 6.3)                                                         |
| Having 0 lifestyle risk factors <sup>  </sup>          |       |                                                       |                                                                          |
| Asian - White                                          | 7643  | 8.6 (2.6 to 14.6)                                     | -1.8 (-7.1 to 3.5)                                                       |
| Black - White                                          |       | -9.3 (-12.3 to -6.2)                                  | -5.7 (-8.4 to -2.9)                                                      |
| Hispanic - White                                       |       | -3.7 (-7.2 to -0.2)                                   | 0.5 (-3.5 to 4.4)                                                        |
| Having only 1 lifestyle risk factors <sup>  </sup>     |       |                                                       |                                                                          |
| Asian - White                                          | 7373  | 2.5 (-3.2 to 8.3)                                     | -3.2 (-9.9 to 3.4)                                                       |
| Black - White                                          |       | -2.8 (-6.4 to 0.8)                                    | 0.7 (-3.3 to 4.7)                                                        |
| Hispanic - White                                       |       | 4.7 (0.6 to 8.8)                                      | 8.1 (3.4 to 12.9)                                                        |
| Having at least 2 lifestyle risk factors <sup>  </sup> |       |                                                       |                                                                          |
| Asian - White                                          | 7519  | -11.8 (-17.5 to -6.2)                                 | 4.2 (-2.5 to 10.9)                                                       |
| Black - White                                          |       | 12 (7.6 to 16.4)                                      | 4.1 (-0.1 to 8.2)                                                        |
| Hispanic - White                                       |       | -1.3 (-6.2 to 3.6)                                    | -7.1 (-11.8 to -2.5)                                                     |

\* Total unweighted sample sizes.

<sup>†</sup> Multivariable weighted logistic regression models were used to assess racial and ethnic differences in the prevalence of lifestyle risk factors.

<sup>‡</sup> Social risk factors included education (<high school, high school graduate, some college, and ≥college graduate), home ownership (yes/no), employment status (yes/no), health insurance status (yes/no), regular health care access (yes/no), food security status (secure, marginal and insecure), and country of birth (America/others).

<sup>§</sup> Definitions for lifestyle risk factors are shown in Table S1.

<sup>||</sup> Included current smoking, excessive drinking, poor diet quality, inadequate physical activity, and inappropriate sleep duration (definitions are shown in Table S1).

**Table S10. Prevalence of poor diet quality defined by different criteria according to demographic variables and social risk factors.**

| Characteristics                   | Prevalence, % (95% CI)*     |                  |
|-----------------------------------|-----------------------------|------------------|
|                                   | <41 out of 100 <sup>†</sup> | <60 out of 100   |
| Total                             | 24.2 (22.1-26.2)            | 74.9 (72.8-76.9) |
| Age group, y                      |                             |                  |
| 18-24                             | 30.8 (27.2-34.3)            | 81.6 (78.9-84.2) |
| 25-29                             | 26.4 (23.2-29.7)            | 75.4 (71.3-79.5) |
| 30-34                             | 22.7 (19.0-26.5)            | 71.0 (66.8-75.2) |
| 35-39                             | 20.2 (16.7-23.8)            | 71.6 (67.9-75.2) |
| 40-44                             | 16.7 (13.1-20.3)            | 71.1 (67.3-74.9) |
| Sex                               |                             |                  |
| Male                              | 25.9 (23.7-28.0)            | 78.8 (76.7-80.9) |
| Female                            | 22.3 (19.7-24.9)            | 70.6 (67.9-73.3) |
| Race and ethnicity                |                             |                  |
| Non-Hispanic Asian                | 13.2 (9.6-16.8)             | 59.2 (55.1-63.2) |
| Non-Hispanic Black                | 29.2 (25.7-32.7)            | 83.4 (80.9-85.9) |
| Hispanic                          | 20.9 (18.1-23.8)            | 73.4 (70.6-76.2) |
| Non-Hispanic White                | 25.3 (22.5-28.1)            | 74.8 (71.9-77.8) |
| Other <sup>‡</sup>                | 26.5 (20.9-32.2)            | 79.8 (74.0-85.5) |
| Education level                   |                             |                  |
| Less than high school             | 29.6 (25.6-33.6)            | 85.0 (82.2-87.8) |
| High school graduate              | 31.1 (27.7-34.4)            | 82.7 (80.1-85.4) |
| Some college                      | 26.0 (23.0-29.1)            | 77.9 (75.2-80.7) |
| College graduate or higher        | 14.2 (11.8-16.5)            | 60.2 (56.4-63.9) |
| Family income-to-poverty ratio    |                             |                  |
| ≤100%                             | 30.5 (26.9-34.2)            | 81.5 (79.2-83.7) |
| >100%-299%                        | 26.6 (24.0-29.2)            | 78.2 (75.9-80.6) |
| ≥300%-499%                        | 23.4 (19.1-27.8)            | 71.3 (67.4-75.3) |
| ≥500%                             | 15.3 (12.3-18.3)            | 65.4 (60.9-69.8) |
| Food security status <sup>§</sup> |                             |                  |
| Secure                            | 21.6 (19.3-23.9)            | 71.2 (68.6-73.7) |
| Marginal                          | 26.2 (22.1-30.3)            | 78.1 (74.7-81.5) |
| Insecure                          | 31.3 (28.1-34.6)            | 84.7 (82.2-87.1) |
| Employment status                 |                             |                  |
| Employed                          | 23.2 (21.0-25.5)            | 74.0 (71.5-76.4) |
| Unemployed                        | 26.8 (24.0-29.7)            | 77.5 (74.8-80.2) |
| Home ownership                    |                             |                  |
| Owned home                        | 23.6 (20.9-26.3)            | 74.7 (72.0-77.3) |
| Not owned home <sup>  </sup>      | 25.2 (22.8-27.6)            | 75.4 (72.9-77.9) |
| Insurance status                  |                             |                  |
| Insured                           | 22.9 (20.6-25.2)            | 72.7 (70.4-75.0) |
| Uninsured                         | 28.4 (25.2-31.7)            | 81.9 (79.3-84.4) |
| Regular health care access        |                             |                  |
| ≥1 Health care facilities         | 23.3 (21.0-25.5)            | 73.6 (71.2-76.0) |
| None                              | 26.6 (23.7-29.5)            | 78.3 (75.2-81.4) |



Country of birth

|                 |                  |                  |
|-----------------|------------------|------------------|
| America         | 26.6 (24.3-29.0) | 77.4 (75.1-79.6) |
| Other countries | 13.5 (11.4-15.6) | 64.8 (61.7-68.0) |

---

\* Estimates for overall and by age groups were unadjusted. Other estimates were age-standardized to the 2017-2018 National Health and Nutrition Examination Survey nonpregnant adult population, using the age groups 18 to 29 years, 30 to 39 years, and 40 to 44 years. All estimates were weighted.

† The 25th percentile of the HEI-2015 score.

‡ The “other” group included other non-Hispanic races and mixed races.

§ Food security level was measured using the US Household Food Security Survey Module in which 10 questions were used to create 4 response levels: full food security, marginal food security, low food security, and very low food security. Low food security and very low food security were combined into the “Insecure” category.

|| Renting a home or having other arrangements.

**Figure S1. Flow chart of sample sizes for lifestyle risk factors.**

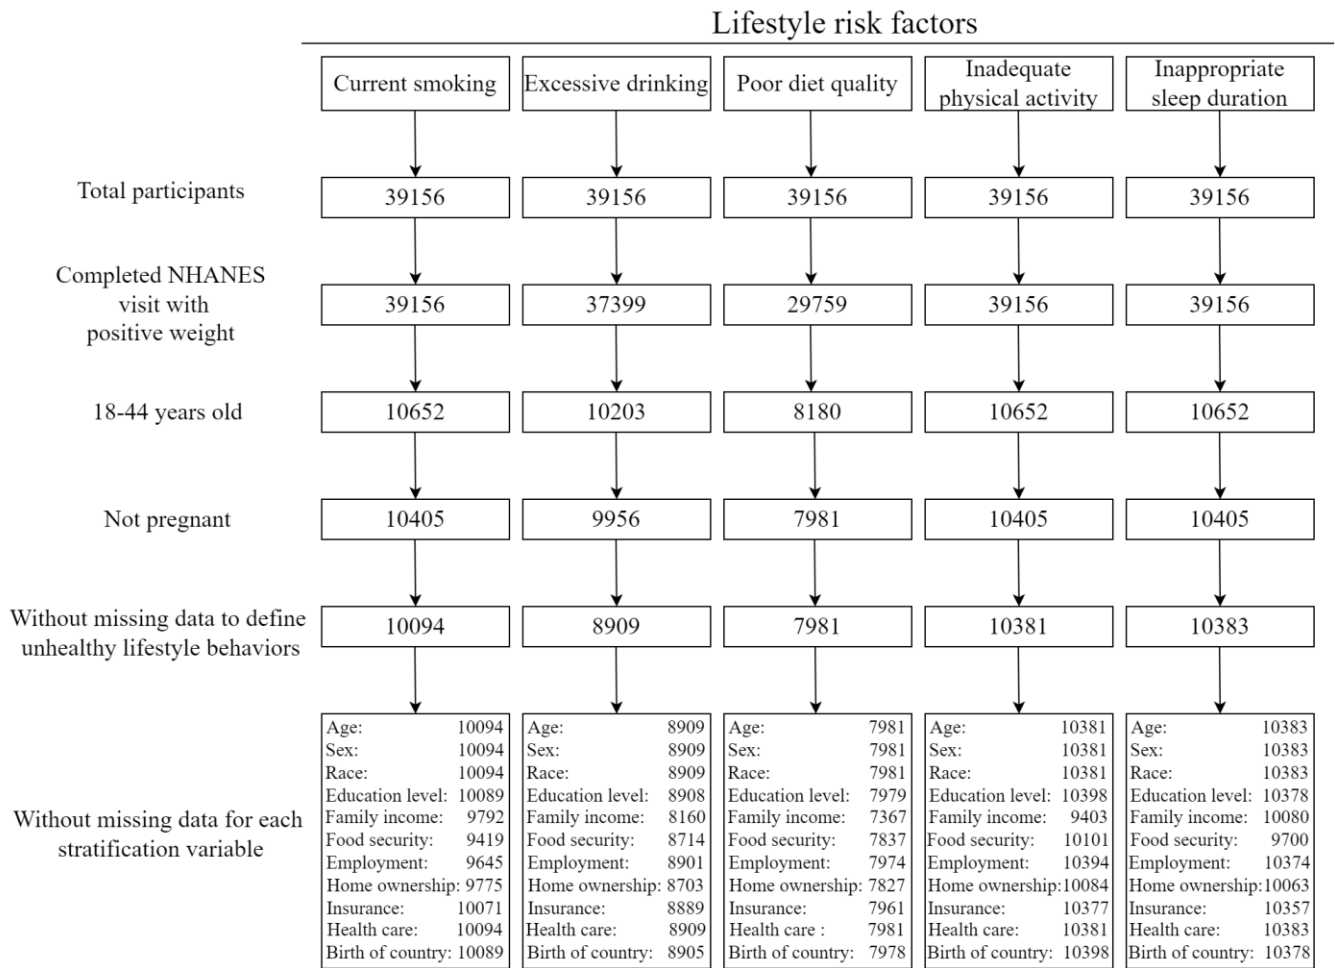

**Figure S2. Flow chart of sample sizes for cardiometabolic diseases.**

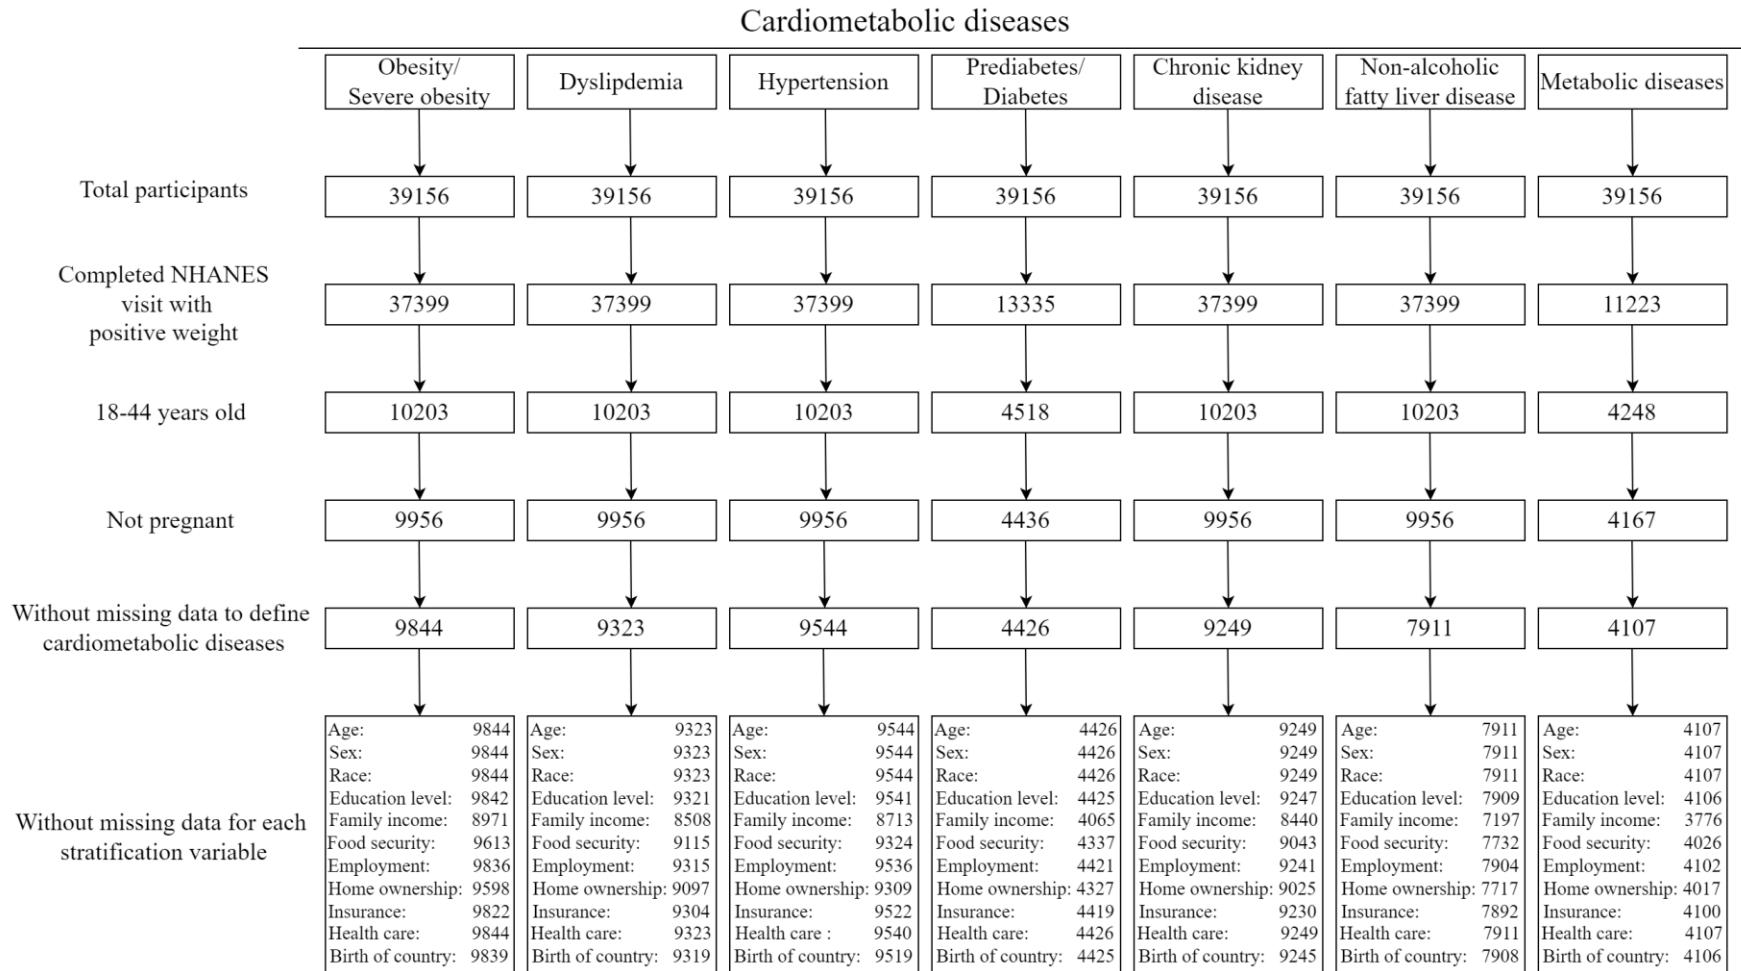

**Figure S3. Flow chart of sample sizes for clustering of lifestyle risk factors and cardiometabolic diseases.**

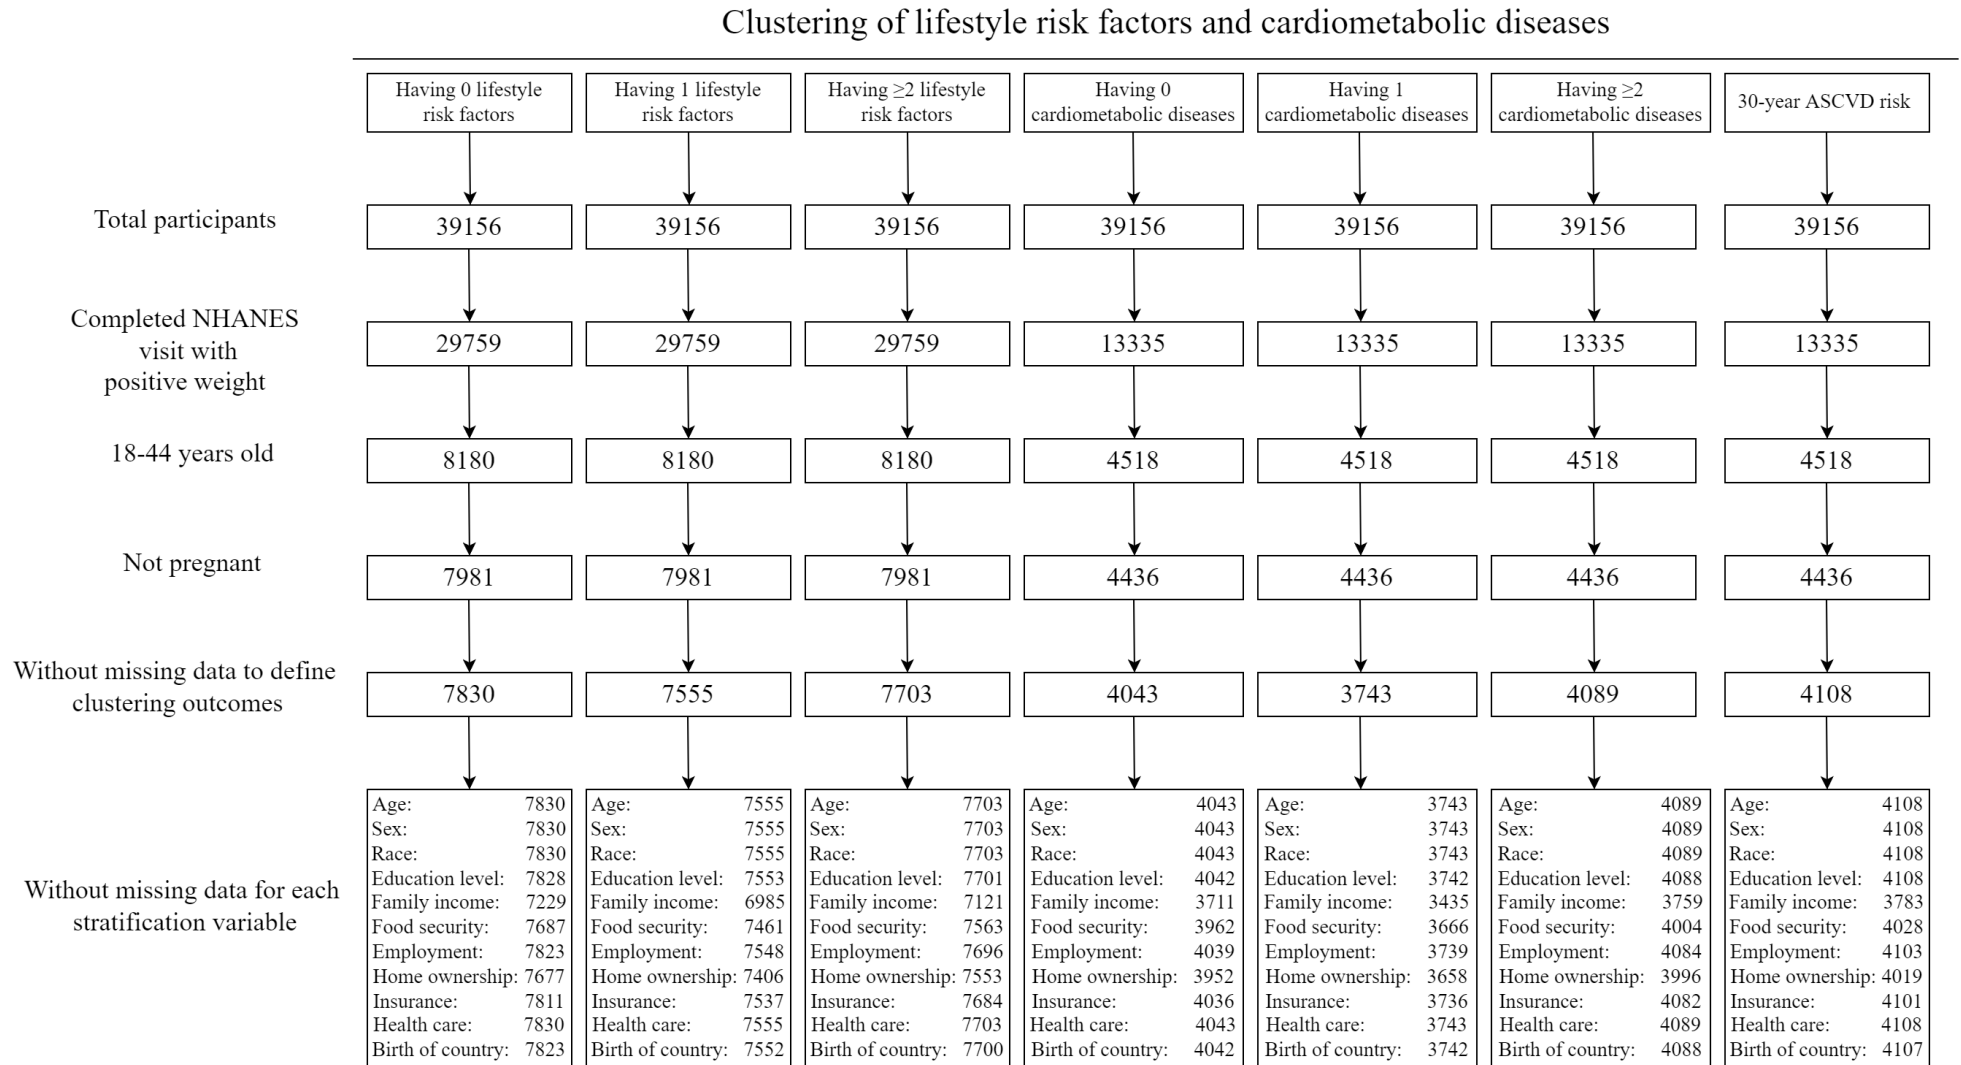

Supplement: JAH3-12-e028926-s001.pdf [file JAH3-12-e028926-s001.pdf]
